1  
2  
3  
4  
5  
6  
7  
8  
9  
10  
11  
12  
13  
14  
15  
16  
17  
18  
19  
20  
21  
22  
23  
24  
25  
26

**Title: Acetylcholine inhibits platelet activation and regulates hemostasis.**

**Authors:** John A. Bennett,<sup>1</sup> Sara K. Ture,<sup>1</sup> Rachel A. Schmidt,<sup>1</sup> Michael A. Mastrangelo,<sup>1</sup> Scott J. Cameron,<sup>1</sup> Lara E. Terry,<sup>2</sup> David I. Yule,<sup>2</sup> Craig N. Morrell,<sup>1</sup> Charles J. Lowenstein<sup>1</sup>

**Author Affiliations:**

<sup>1</sup>Aab Cardiovascular Research Institute, Department of Medicine, University of Rochester Medical Center Rochester, NY 14624

<sup>2</sup>Department of Pharmacology and Physiology, University of Rochester Medical Center, 14624

**Short title: Acetylcholine inhibits platelet activation.**

**Corresponding Author:**

Charles J. Lowenstein, University of Rochester Medical Center 601 Elmwood Avenue, Box G-1441 Rochester, NY 14642 Tel: 585-276-5077 E-mail:

[charles\\_lowenstein@urmc.rochester.edu](mailto:charles_lowenstein@urmc.rochester.edu)

**Keywords:**

Alpha-granule, nitric oxide, P-selectin, platelet, thrombosis.

**Subject codes:** Basic, Translational, and Clinical Research: Platelets

**Word Count:** 5145

**Figure Count:** 5 figures

27 **Abstract**

28 Platelets are key mediators of thrombosis. Many agonists of platelet activation are  
29 known, but there are fewer identified endogenous inhibitors of platelets, such as prostacyclin  
30 and nitric oxide (NO). Acetylcholinesterase inhibitors such as donepezil can cause bleeding in  
31 patients, but the underlying mechanisms are not well understood. We hypothesized that  
32 acetylcholine is an endogenous inhibitor of platelets.

33 We measured the effect of acetylcholine or analogues of acetylcholine upon human  
34 platelet activation *ex vivo*. We characterized expression of components of the acetylcholine  
35 signaling pathway in human platelets. We tested the effect of a subunit of the acetylcholine  
36 receptor, *CHRNA7*, on acetylcholine signaling in platelets. Acetylcholine and analogues of  
37 acetylcholine inhibited platelet activation, as measured by P-selectin translocation and GPIIb/IIIa  
38 conformational changes. Conversely, we found that antagonists of the acetylcholine receptor  
39 such as pancuronium enhance platelet activation. Furthermore, drugs inhibiting  
40 acetylcholinesterase such as donepezil also inhibit platelet activation, suggesting that platelets  
41 release acetylcholine. We found that NO mediates acetylcholine inhibition of platelets. Human  
42 platelets express members of the acetylcholine signaling pathway including *CHRNA2*, *CHRNA7*,  
43 *CHRNB1*, and *ACHE*. Platelets from mice lacking *Chrna7* are hyperactive when stimulated by  
44 thrombin and resistant to inhibition by acetylcholine. Furthermore, acetylcholinesterase  
45 inhibitors prolonged bleeding in wild-type mice. Knockout mice lacking *Chrna7* subunits of the  
46 acetylcholine receptor display prolonged bleeding as well.

47 Our data suggest that acetylcholine is an endogenous inhibitor of platelet activation. The  
48 cholinergic system may be a novel target for anti-thrombotic therapies.

49

50

51

52 **Abbreviations**

53 NO nitric oxide

54 CHRNA7 cholinergic receptor neuronal nicotinic alpha polypeptide 7

55 GPIIbIIIa glycoprotein IIb IIIa

56 AChR acetylcholine receptors

57 AChE acetylcholinesterase

58 TRAP thrombin receptor activating peptide 6

59 PAR1 protease activated receptor 1

60 P2Y12 purinergic receptor P2Y

61 GPVI glycoprotein VI

62 NOS3 nitric oxide synthase isoform 3

63 L-NAME L-nitroarginine methyl ester

## 64 **Introduction**

65

66 Platelet activation is crucial for hemostasis and thrombosis (1-3) . A variety of agonists  
67 activate platelets in vivo, including thrombin, collagen, and ADP (4-8). An equally important  
68 aspect of platelet biology is inhibition of activation, limiting excess thrombosis which can  
69 otherwise lead to stroke or pulmonary embolism. Endogenous platelet inhibitors include factors  
70 released from endothelial cells such as nitric oxide and prostacyclin (9-12).

71 Studies of adverse bleeding reactions to commonly used drugs can reveal novel  
72 inhibitors of platelet function (13). For example, a few case reports have suggested that  
73 acetylcholinesterase inhibitors are associated with bleeding (14, 15). Several clinical trials have  
74 examined the safety of donepezil, and one of these trials showed that donepezil increases the  
75 risk of bruising (16, 17). A meta-analysis of clinical trials of acetylcholinesterase inhibitors shows  
76 that these drugs increase the risk of bruising by 1.5 fold compared to placebo, although this  
77 increased risk is not significant (18). These isolated clinical studies suggest that acetylcholine  
78 may be an endogenous inhibitor of platelet activation.

79 Prior work from other laboratories suggests that acetylcholine receptors (AChR) are  
80 involved in platelet function. Human platelets express subunits of the acetylcholine receptor (19).  
81 Artificial agonists of AChR stimulate calcium flux across human platelet membranes (19).  
82 Agonists of AChR decrease human platelet activation as measured by GPIIb/IIIa conformational  
83 changes and by aggregation (19). Finally, platelets from mice lacking AChR subunit *Chrna7*  
84 have increased activation when stimulated by ADP (20). These important experimental studies  
85 suggest that acetylcholine signaling plays a role in inhibiting platelets both in vitro and in vivo.

86 Gaps remain in our collective knowledge pertaining to the effect of acetylcholine upon  
87 platelets. The effect of acetylcholine on platelets stimulated with endogenous agonists other  
88 than ADP is not yet completely known. The effect of acetylcholine on platelet degranulation is  
89 not fully understood. The effect of endogenous acetylcholine signaling on hemostasis and

90 thrombosis is not well defined. The expression of genes involved in acetylcholine signaling in  
91 human platelets is not fully described. And the mechanisms through which clinical drugs  
92 targeting acetylcholine affect bleeding in humans has not yet been explored. Determining the  
93 role that acetylcholine signaling plays in inhibition of platelet function may help clinicians avoid  
94 the toxicity of drugs that target the parasympathetic nervous system, and may help us uncover  
95 new pathways which inhibit platelet function.

96

97

98

99

100

101 **Materials and Methods**

102

103 *Human Platelet Collection*

104 Human blood collection was performed as previously described using protocols approved  
105 by the Institutional Review Board at the University of Rochester Medical Center (IRB Protocol  
106 RSRB00028659) (21). Normal healthy blood donors were recruited. Subjects were excluded if  
107 they had used aspirin or any nonsteroidal anti-inflammatory agent within 10 days before the  
108 blood draw. Blood was collected by venipuncture into sodium citrate anticoagulant tubes. Whole  
109 blood was centrifuged at  $180 \times g$  for 15 min to isolate the top layer of platelet-rich plasma (PRP).  
110 PRP was diluted 1:20 in room temperature Tyrode's Buffer (134 mM NaCl, 2.9 mM KCl, 12 mM  
111 NaHCO<sub>3</sub>, 0.34 mM Na<sub>2</sub>HPO<sub>4</sub>, 20 mM HEPES, pH 7.0, 5 mM glucose, 0.35% bovine serum  
112 albumin) and dispensed in 100  $\mu$ L volumes for treatment with various drugs.

113

114 *Platelet Drug Treatment*

115 Human platelets were suspended in Tyrode's buffer and placed into microcentrifuge  
116 tubes. Drugs were added and the platelets were incubated for 15 min at room temperature. To  
117 some samples, L-nitroarginine methyl ester (L-NAME) was added first and incubated for 15 min,  
118 then carbachol (Sigma Aldrich) or acetylcholine (Sigma Aldrich) for 15 min, and then TRAP  
119 (Tocris Bioscience) or thrombin (Cayman Chemical) for 15 min. Platelets were first treated for 15  
120 minutes with 1,2-bis(o-aminophenoxy)ethane-N,N,N',N'-tetraacetic acid (BAPTA) and  
121 trifluoperazine (TFP) (Sigma Aldrich) for some experiments. For calcium flux experiments with  
122 Fura-2 AM, platelet rich plasma was loaded with Fura-2 AM at 5 $\mu$ M for 1 hour at 37 degrees  
123 Celsius, and then further prepared as above to yield platelets loaded with Fura-2. HEK293 cells  
124 were also loaded as a positive control. Cells were analyzed on a Flexstation 3 (Molecular  
125 Devices) for the 340/380 Fura-2 AM ratio.

126

127 *Detection of platelet activation by flow cytometry*

128 Phycoerytherin-labeled antibody to CD62P (P-selectin) (Bectin Dickinson) at a dilution of  
129 1:100 was added to platelets following stimulation or drug treatment for 30 min. Platelets were  
130 then fixed in 1% formalin. Surface P-selectin was measured by flow cytometry (LSRII, Becton  
131 Dickinson). To detect conformational changes in GPIIbIIIa, FITC-fibrinogen (Abcam) was added  
132 for 30 minutes, and platelets were analyzed by flow cytometry. We have previously used these  
133 techniques to measure platelet activation (22)

134

135 *Quantification of cGMP levels by ELISA*

136 Platelets were treated and stimulated as described above. The reactions were stopped  
137 and cells lysed by the addition of HCl to a final concentration of 0.1 M. Samples were cleared by  
138 centrifugation (14,000 rpm) for 20 minutes. Samples were then analyzed for cGMP content using  
139 a commercially available ELISA (Cayman Chemical).

140

141 *qPCR for detection of ACh receptor gene expression*

142 qPCR was performed as previously described (23). Murine tissue was harvested  
143 immediately following euthanasia and placed on dry ice. Total RNA was isolated with a kit  
144 (RNEasy, Qiagen) following the manufacture's protocol. The A260/A280 ratio of all samples  
145 were between 1.9-2.1 as measured by spectrophotometry (NanoDrop; Thermo Scientific). cDNA  
146 was synthesized using a kit (RT<sup>2</sup> Reverse Transcription, SA Biosciences). Quantitative real-time  
147 PCR was performed by SYBR Green gene expression assay using Prime PCR Supermix (Bio-  
148 Rad) for 40 cycles on an CFX96 thermal cycler (Bio-Rad). Three independent experiments were  
149 performed for each tissue, and in each experiment SYBR green quantification was repeated in  
150 triplicate for each sample. Prime PCR primer sets were purchased from Bio-Rad. Expression  
151 results were calculated by  $\Delta\Delta CT$  method and were normalized to the reference genes GAPDH  
152 and  $\beta$ Actin.

153

154 *Mice*

155 All animal experiments were performed under protocols approved by the University of  
156 Rochester Medical Center Institutional Animal Care and Use Committee. Mice were obtained  
157 from The Jackson Laboratories (Bar Harbor, ME), including C57Bl/6J wild-type mice (C57BL/6J)  
158 and *Chrna7* null mice (B6.129S7-*Chrna7*tm1Bay/J), and bred and maintained in a pathogen free  
159 housing room with *ad libitum* access to food and water on a 12/12 light dark cycle.

160

161

162 *Collection and Preparation and Analysis of Mouse Platelets*

163 Collection of blood was performed as previously described (22). Murine blood was obtained  
164 by retro-orbital bleeding of anesthetized animals into heparinized Tyrode's buffer (134 mM NaCl,  
165 2.9 mM KCl, 12 mM NaHCO<sub>3</sub>, 0.34 mM Na<sub>2</sub>HPO<sub>4</sub>, 20 mM HEPES, pH 7.0, 5 mM glucose,  
166 0.35% bovine serum albumin) in Eppendorf tubes. The blood was then centrifuged to yield  
167 platelet rich plasma which was then washed in new tubes containing Tyrode's buffer with 1%  
168 PGE<sub>2</sub> to prevent platelet activation. Platelets were then pelleted by 5 min 600 × *g* centrifugation  
169 at room temperature and the supernatant was discarded. The pelleted platelets were gently  
170 resuspended in Tyrode's buffer and kept at room temperature for further experiments. For  
171 platelet activation, diluted platelet suspension was divided into 100 μl aliquots, stimulated with  
172 10 μl PBS or thrombin for 10 min followed by staining with anti-CD62P-FITC (eBiosciences) or  
173 FITC-fibrinogen (eBiosciences) for 15 min, and immediately fixed with 2% formalin. The  
174 fluorescence intensity was measured on an LSRII flow cytometer (BD Biosciences). The data  
175 were analyzed with FlowJo software (Tree Star Inc.).

176

177 *Mouse tail bleeding assay.*



178 Hemostasis assays were performed as previously described (22). In brief, mouse tail  
179 bleeding time was measured by placing mice on nose cones delivering 2.5% v/v isoflurane. The  
180 distal 3 mm of the tail was amputated by a single cut from a sterile razor blade, the tail was  
181 immersed immediately in 37°C PBS, and the time to visual cessation of bleeding for 30 sec or  
182 continuous bleeding to 20 min maximal duration, whichever occurred first, was recorded.

183

#### 184 *Statistical analyses.*

185 Data were analyzed by two-tailed Student's t-test for comparison of two groups, and by  
186 Bonferroni corrected two-way ANOVA to compare means of three or more groups. Statistical  
187 significance was defined as  $P < 0.05$ .

188

#### 189 *Study approval.*

190 All in vivo procedures on mice were approved by the Division of Laboratory Animal  
191 Medicine at the University of Rochester Medical Center. Human blood collection was performed  
192 using protocols approved by the Institutional Review Board at the University of Rochester  
193 Medical Center.

194

195

196

## 197 **Results**

### 198 *Acetylcholine receptors regulate platelet activation*

199           Since patients taking acetylcholine inhibitors have an increased risk of bleeding, we  
200 hypothesized that increased acetylcholine signaling directly inhibits platelet activation. To test  
201 this hypothesis, we first analyzed the effect of carbachol, an analog of acetylcholine, on platelet  
202 activation. We treated human platelets with increasing concentrations of carbachol, and then  
203 stimulated the platelets with the thrombin receptor agonist thrombin receptor activating peptide 6  
204 (TRAP). Carbachol inhibits human platelets activation in a dose dependent manner (Figure 1A).  
205 We next explored the effect of acetylcholine on platelet activation. Acetylcholine inhibits TRAP  
206 activation of human platelets in a dose responsive manner by over 25% of maximal stimulation  
207 (Figure 1B), and acetylcholine inhibits platelet activation over a range of TRAP doses (Figure  
208 1C).

209           We tested the effect of acetylcholine signaling upon platelets stimulated with different  
210 agonists, including: TRAP, which activates the thrombin receptors PAR1 and PAR4; ADP,  
211 which activates the ADP receptor P2Y12; U44619 which activates the thromboxane receptor TP;  
212 and convulxin, which activates the collagen receptor GPVI. Although carbachol inhibits TRAP  
213 activation of human platelets, carbachol has no effect on platelet activation by other agonists  
214 (Figure 1D).

215           The above data show that acetylcholine inhibits alpha-granule release. Next we tested  
216 the effect of acetylcholine signaling on other aspects of platelet activation, namely dense granule  
217 secretion and GPIIb/IIIa conformational changes. We found that the acetylcholine analogue  
218 carbachol decreases dense granule exocytosis measured by release of ATP (Figure 1E) and  
219 inhibits GPIIb/IIIa activation measured by FITC-fibrinogen binding (Figure 1F). Furthermore,  
220 endogenous acetylcholine has the same effect (as shown when the acetylcholine esterase  
221 inhibitor pyridostigmine is added) (Figure 1E).

222 Taken together, these data suggest that stimulation of the acetylcholine receptor inhibits  
223 platelet activation.

224 Figure 1. Acetylcholine receptors regulate platelet activation. (A) Carbachol inhibits  
225 platelet activation. Human platelets were isolated and treated with PBS or carbachol, stimulated  
226 with PBS or 10  $\mu$ M TRAP, and analyzed for surface expression of P-selectin using flow  
227 cytometry. (N=4  $\pm$  S.D. \*P < 0.05 for TRAP vs. TRAP + carbachol.) (B) Acetylcholine inhibits  
228 platelet activation. Human platelets were treated with PBS or ACh, stimulated with PBS or 10  $\mu$ M  
229 TRAP and analyzed as above. (N=4  $\pm$  S.D. \*P < 0.05 for TRAP vs. TRAP + ACh.) (C)  
230 Carbachol inhibits platelet activation over a range of TRAP doses. Platelets were stimulated with  
231 varying concentrations of TRAP and analyzed for surface expression of P-selectin as above.  
232 (N=4  $\pm$  S.D. \*P < 0.05 for the indicated concentration of TRAP vs. TRAP + carbachol.) (D)  
233 Carbachol inhibits platelet activation by TRAP but not by ADP, U44619, or convulxin. Isolated  
234 human platelets were treated with PBS or 10 nM carbachol, then stimulated with various  
235 agonists, and analyzed via flow cytometry. (N=4  $\pm$  S.D. \*P < 0.05 for agonist vs. agonist +  
236 carbachol.) (E) Carbachol inhibits platelet dense granule release. Platelets were isolated and  
237 treated with 10 nM carbachol, 100  $\mu$ M pyridostigmine bromide or 100 nM pancuronium bromide,  
238 and then stimulated with PBS or TRAP and analyzed for surface expression of P-selectin. . (N=4  
239  $\pm$  S.D. \*P < 0.05 for TRAP vs. TRAP and indicated compound.) (F) Carbachol inhibits GPIIb/IIIa  
240 activation as measured by FITC-fibrinogen binding to platelets. Platelets were isolated and  
241 treated with 10 nM carbachol, and then stimulated with the indicated concentrations of TRAP  
242 and analyzed for surface expression of P-selectin. (N=4  $\pm$  S.D. \*P < 0.05 for TRAP vs. TRAP +  
243 carbachol.)

244

245

246

247

248 *Endogenous acetylcholine inhibits platelet activation*

249 While acetylcholine signaling inhibits platelet activation, the potential source of  
250 acetylcholine in vivo remains unclear. We hypothesized that platelets release acetylcholine  
251 which inhibits platelet activation in an autocrine or paracrine manner. We treated platelets with  
252 the acetylcholinesterase inhibitor pyridostigmine bromide prior to activation. We observed that  
253 inhibition of acetylcholinesterase (AChE) decreases platelet activation (Figure 2A). This is  
254 consistent with the idea that pyridostigmine bromide inhibits acetylcholinesterase, increasing the  
255 amount of acetylcholine released by platelets which is available to signal through the  
256 acetylcholine receptor. We then confirmed that pancuronium bromide, which antagonizes the  
257 acetylcholine receptor, enhances platelet activation (Figure 2B). We tested these effect of these  
258 compounds on platelet GPIIb/IIIa activation using FITC-fibrinogen, and observed that agonism of  
259 acetylcholine receptors inhibits, and antagonism of acetylcholine receptors enhances binding  
260 (Figure 2C).

261 Patients who take donepezil may have an increased risk of bleeding (14, 16, 17). Since  
262 donepezil is an acetylcholinesterase inhibitor, we hypothesized that donepezil inhibits platelet  
263 activation. To test this hypothesis, we treated platelets with donepezil hydrochloride and then  
264 stimulated them with TRAP. Donepezil inhibits platelet activation (Figure 2D). These data are  
265 consistent with the hypothesis that endogenous acetylcholine released from platelets inhibits  
266 platelet activation.

267 Collectively, these data suggest platelets can release acetylcholine which limits  
268 activation, and endogenous acetylcholinesterase limits the extent of endogenous acetylcholine  
269 signaling.

270 Figure 2. Endogenous acetylcholine inhibits platelet activation. (A) Pyridostigmine  
271 inhibition of AChE permits endogenous acetylcholine inhibition of activation of human platelets.  
272 Isolated human platelets were treated with 100  $\mu$ M pyridostigmine, or 100  $\mu$ M pyridostigmine  
273 and 100  $\mu$ M ACh, stimulated with 10  $\mu$ M TRAP and then analyzed for P-selectin using flow

274 cytometry. (N=4 ± S.D. \*P < 0.05 for TRAP vs. TRAP + pyridostigmine/ACh.) (B) Pancuronium  
275 antagonism of acetylcholine receptor blocks endogenous acetylcholine inhibition of human  
276 platelets. Isolated human platelets were treated with pancuronium, and then stimulated with 10  
277 uM TRAP and analyzed for P-selectin using flow cytometry. (N=4 ± S.D. \*P < 0.05 for TRAP vs.  
278 TRAP + pancuronium.) (C) Endogenous ACh inhibits GPIIb/IIIa conformational changes.  
279 Platelets were isolated and treated with 10 nM carbachol, 100 uM pyridostigmine or 100 nM  
280 pancuronium bromide and analyzed for FITC-fibrinogen binding to measure GPIIb/IIIa activation.  
281 (N=4 ± S.D. \*P < 0.05 for TRAP vs. TRAP + indicated compound.) (D) Donepezil inhibition of  
282 AChE permits endogenous acetylcholine inhibition of activation of human platelets. Isolated  
283 human platelets were treated with donepezil hydrochloride, then stimulated with 10 uM TRAP  
284 and analyzed for P-selectin using flow cytometry. (N=4 ± S.D. \*P < 0.05 for TRAP vs. TRAP +  
285 donepezil.)

286

### 287 *Nitric oxide mediates acetylcholine inhibition of platelet activation*

288 We next explored the mechanism through which acetylcholine signaling inhibits platelet  
289 activation. Acetylcholine receptors increase the synthesis of nitric oxide in endothelial cells (24).  
290 Platelets express NOS3 (25). We proposed that nitric oxide mediates acetylcholine inhibition of  
291 platelets. In order to test our idea, we treated human platelets with an inhibitor of nitric oxide  
292 synthase, L-nitroarginine methyl ester (L-NAME), and then treated with carbachol and stimulated  
293 with TRAP. We observed that carbachol inhibits platelets, but NOS inhibition blocks the effects  
294 of carbachol (Figure 3A). To confirm that acetylcholine signaling triggers NO synthesis in  
295 platelets, we measured carbachol stimulation of cGMP, a messenger downstream of NO.  
296 Carbachol increases cGMP levels in human platelets, and the effect of carbachol is blocked by  
297 the NOS inhibitor L-NAME (Figure 3B). The inhibitory effect of NO was further tested with a  
298 range of L-NAME doses. We found that L-NAME inhibits the effects of acetylcholine on platelets  
299 in a dose-dependent manner (Figure 3C). Since calcium signaling can regulate NOS activation,

300 we explored a calcium signaling pathway in platelets. First, carbachol increases intracellular  
301 calcium levels in platelets (Figure 3D). Second, the calcium chelator BAPTA blocks the ability of  
302 carbachol to inhibit platelets. Finally, calmodulin is important for acetylcholine inhibition of  
303 platelet activation (Figure 3F). Taken together, our data suggest that NO mediates acetylcholine  
304 inhibition of platelets via a calcium-calmodulin dependent mechanism.

305 Figure 3. Nitric oxide mediates Ach inhibition of platelet activation. (A) NOS mediates  
306 carbachol inhibition of platelet activation. Isolated human platelets were treated with PBS,  
307 carbachol, L-NAME or L-NAME + carbachol, stimulated with 10  $\mu$ M TRAP, and then analyzed for  
308 P-selectin using flow cytometry. (N = 4  $\pm$  S.D. \*P < 0.05 for TRAP + carbachol vs. TRAP +  
309 carbachol + L-NAME.) (B) NOS mediates carbachol induced production of cGMP. Isolated  
310 human platelets were treated as above, and cGMP content was measured using a commercial  
311 kit. (N = 4  $\pm$  S.D. \*P < 0.05 for TRAP-6 + carbachol vs. TRAP + carbachol + L-NAME.) (C) L-  
312 NAME reversal of carbachol mediated platelet inhibition is dose dependent. Platelets were  
313 isolated as above and treated with 10 nM carbachol, 1 mM, 0.1 mM or 0.01 mM L-NAME and  
314 then stimulated with TRAP and analyzed for surface expression of P-selectin. . (N = 4  $\pm$  S.D. \*P  
315 < 0.05 for TRAP + carbachol vs. TRAP + carbachol + indicated concentration of L-NAME.) (D)  
316 Carbachol elevates intracellular calcium. Platelets or HEK293 cells were loaded with Fura-2 AM,  
317 treated with carbachol and analyzed for calcium flux. (E) Calcium mediates the inhibitory effect  
318 of carbachol. Isolated human platelets were treated with BAPTA, then carbachol and then  
319 stimulated with TRAP and analyzed for surface expression of p-selectin. (N=4) \*P < 0.05 for  
320 carbachol + TRAP vs carbachol + TRAP + BAPTA). (F) Calmodulin activity is required for the  
321 inhibitory effect of carbachol. Platelets were treated with TFP, then carbachol and then  
322 stimulated with TRAP and analyzed for surface expression of p-selectin. \*P < 0.05 for TRAP +  
323 carbachol vs. TRAP + carbachol + TFP).

324

325 *Human platelets express mRNA encoding acetylcholine receptor subunits*

326 We next analyzed human platelets expression of genes involved in acetylcholine  
327 signaling and metabolism. Using qPCR of human platelet RNA, we found that human platelets  
328 express mRNA for a subunit of the acetylcholine receptor CHRNA7 and acetylcholinesterase  
329 ACHE (Figure 4A). Since our qPCR data suggest that human platelets express *CHRNA7*  
330 mRNA, we then evaluated if platelets express CHRNA7 protein using a well characterized  
331 natural toxin, alpha-bungarotoxin ( $\alpha$ -BT), which selectively binds to CHRNA7 subunits. We  
332 found that FITC labeled  $\alpha$ -BT binds to human platelets, and this binding is specific since the  
333 binding can be competitively inhibited by excess non-labeled  $\alpha$ -BT (Figure 4B). These data  
334 confirm that platelets express functional CHRNA7 subunits on their surface.

335 Figure 4. Human platelets express genes related to ACh signaling. (A) Platelets express  
336 mRNA transcripts encoding proteins involved in ACh signaling. RNA was isolated from human  
337 platelets, a cDNA library was generated, and qPCR was used to evaluate expression of genes  
338 related to ACh signaling. Results representative of two separate plate runs, using independent  
339 platelet preparations (B) Human platelets express CHRNA7 on their surface. Isolated human  
340 platelets were stained with fluorescently labeled  $\alpha$ BT in the presence of excess amounts of non-  
341 labeled  $\alpha$ BT. (N = 4  $\pm$  S.D. \*P < 0.05 for  $\alpha$ BT 0 X vs. 1X or 10 X or 100 X.)

342

#### 343 *The acetylcholine receptor subunit CHRNA7 inhibits platelet activation*

344 We next tested the hypothesis that acetylcholine alters platelet activation by signaling  
345 through the CHRNA7 subunit of the acetylcholine receptor complex. We treated platelets from  
346 *Chrna7* (WT) or *Chrna7* (KO) mice with thrombin and measured their activation by examining P-  
347 selectin exposure and fibrinogen binding to the integrin GPIIb/IIIa. We observed that *Chrna7*(KO)  
348 mice are more sensitive to activation by thrombin indicated by P-selectin exposure (Figure 5A),  
349 and that they reach maximum changes in integrin GPIIb/IIIa conformation at lower doses of  
350 thrombin than WT controls (Figure 5B). This is consistent with the idea that endogenous  
351 acetylcholine signaling inhibits platelets.

352 We also tested the ability of *Chrna7* to mediate acetylcholine inhibition of platelet  
353 activation. Acetylcholine inhibits activation of platelets from *Chrna7*(WT) mice but fails to inhibit  
354 activation of platelets from *Chrna7*(KO) mice (Figure 5C). The acetylcholine receptor agonist  
355 carbachol also inhibits activation of platelets from wild-type mice but not from *Chrna7*(KO) mice  
356 (Figure 5C).

357

### 358 *Acetylcholine signaling regulates hemostasis in mice*

359 We next tested the effect of acetylcholine signaling in vivo. Clinical case reports suggest  
360 that acetylcholinesterase inhibitors are associated with increased risk of bleeding in humans (14,  
361 15). To test the hypothesis that endogenous acetylcholine inhibits hemostasis in vivo, we  
362 employed tail transection as a murine model of hemostasis (26). We used two complementary  
363 approaches, genetic and pharmacological.

364 For a genetic approach, we compared *Chrna7*(WT) and *Chrna7*(KO) mice. *Chrna7*(KO)  
365 mice have shorter bleeding times than wild-type mice in a tail transection model of hemostasis  
366 (Figure 5D).

367 For a pharmacological approach, we treated mice with donepezil, an AChE inhibitor, and  
368 then measured time to cessation of tail bleeding. Donepezil prolongs the bleeding time of mice  
369 (Figure 5E). We also confirmed that the acetylcholine receptor agonist carbachol increases  
370 bleeding time (Figure 5E).

371 These data suggest that endogenous acetylcholine inhibits platelet activation and  
372 hemostasis in vivo.

373 Figure 5. ACh signaling in vivo inhibits hemostasis and platelet activation. (A) Platelets  
374 isolated from mice lacking *CHRNA7* AChR subunits translocate more P-selectin when stimulated  
375 with thrombin. Isolated platelets were treated with thrombin at the indicated concentration and  
376 then analyzed for P-selectin using flow cytometry. (N = 4 ± S.D. \*P < 0.05 for platelets from  
377 *Chrna7*(WT) vs. *Chrna7*(KO) mice.) (B) Platelets isolated from mice lacking *CHRNA7* AChR



378 subunits display more active GPIIb/IIIa when stimulated with thrombin. Isolated platelets were  
379 treated with the indicated concentrations of thrombin, and then analyzed for FITC-fibrinogen  
380 binding using flow cytometry. (N = 4 ± S.D. \*P < 0.05 for platelets from *Chrna7*(WT) vs.  
381 *Chrna7*(KO) mice.) (C) Platelets isolated from mice lacking CHRNA7 AChR subunits are not  
382 responsive to acetylcholine or carbachol inhibition. Isolated platelets were treated with the  
383 indicated concentrations of acetylcholine or carbachol and then stimulated with the indicated  
384 concentration of thrombin. (N = 4 ± S.D. \*P < 0.05 for platelets from *Chrna7*(WT) vs.  
385 *Chrna7*(KO) mice.) (D) Mice lacking CHRNA7 have prolonged bleeding time. Mice of the  
386 indicated genotypes were analyzed for hemostasis using a tail transection assay. (N = 13- 15 \*P  
387 < 0.05 vs. WT control.) (E) Carbachol activation of AChR or donepezil inhibition of AChE  
388 prolongs bleeding time in wild-type mice. Mice were treated with 1 mg/kg donepezil or 0.4 mg/kg  
389 carbachol and then analyzed for hemostasis using a tail transection assay. (N = 15 \*P < 0.05  
390 vs. saline.)

391

## 392 **Discussion**

393 The major finding of our study is that acetylcholine inhibits platelet activation.  
394 Acetylcholine signals through the acetylcholine receptor, increasing NO levels, and inhibiting  
395 platelet activation. Acetylcholine inhibits activation of platelets from humans and mice by over  
396 15%. Acetylcholine signaling is important in vivo, since mice lacking the acetylcholine receptor  
397 subunit *Chrna7* have shorter bleeding times. Finally, an acetylcholinesterase inhibitor drug  
398 used in humans that is associated with bruising also inhibits activation of human platelets and  
399 prolongs bleeding in mice. Taken together, our results suggest that acetylcholine is an  
400 endogenous inhibitor of platelet activation.

401 We showed that CHRNA7 is necessary for acetylcholine inhibition (Figure 5). Two types  
402 of acetylcholine receptors have been described: muscarinic acetylcholine receptors which are G-  
403 protein coupled receptors, and nicotinic acetylcholine receptors are ligand gated ion channels

404 (27, 28). Nicotinic acetylcholine receptors are composed of 5 subunits in different combinations,  
405 including alpha, beta, delta, epsilon, and gamma subunits (29-31). The precise nature of the  
406 acetylcholine receptor in human platelets is not yet defined. Our data suggest that CHRNA7  
407 plays a major role in platelet inhibition by acetylcholine. Further research is needed to identify  
408 the subtypes of acetylcholine receptor and their various functions on platelets.

409 We show that NO mediates acetylcholine inhibition of platelets. Others have  
410 demonstrated that platelets express NOS3 and synthesize NO (25, 32, 33). Prior work has  
411 shown that NO inhibits platelet adhesion, activation, and aggregation (10, 12, 34-36). For  
412 example, we showed that NO inhibits platelet exocytosis (37). Others have shown that  
413 activators of NO can inhibit platelet function (38, 39). Our work extends these prior studies and  
414 shows that calcium-calmodulin signaling and NOS activity mediate acetylcholine inhibition of  
415 platelet activation.

416 Acetylcholine inhibits activation of platelets by thrombin but not by ADP or thromboxane  
417 or convulxin (Figure 4A). There are several possible explanations for this difference. Although  
418 both PAR1 and P2Y12 are GPCR, they signal through different intracellular messenger  
419 pathways (4, 40-42). Convulxin signals through GPIV (43, 44). While these pathways ultimately  
420 converge to stimulate platelet activation as measured by conformational changes in GPIIb/IIIa,  
421 the prior signaling events are different, and might be differentially susceptible to NO. There are  
422 clinical drugs which take advantage of pathway specificity for platelet activation. For example,  
423 ticagrelor inhibits platelet activation by thromboxane-A<sub>2</sub>, but does not inhibit their activation with  
424 ADP or collagen (45-47).

425 We found that acetylcholine inhibits platelet activation in vitro by about 15% (Figure 1B).  
426 Carbachol, an analog of acetylcholine, has a much stronger effect upon platelet activation,  
427 inhibiting P-selectin translocation by over 90% (Figure 1A and 5A). Thus exogenous agonists  
428 like carbachol have a powerful effect upon platelet activation, but endogenous agonists such as  
429 acetylcholine have a more modest inhibitory effect on platelet activation.

430 Our work extends prior research on cholinergic signaling in platelets. Others have shown  
431 that agonists of AChR decrease human platelet activation ex vivo as measured by GPIIb/IIIa  
432 conformational changes and by aggregation (19). We show that acetylcholine itself inhibits  
433 platelet degranulation. (Figure 1B). Others have shown that platelets from mice lacking *Chrna7*  
434 have increased aggregation when stimulated by ADP ex vivo (20). We extend these data,  
435 showing that these platelets do not respond to acetylcholine and have increased exocytosis  
436 (Figure 5C). Finally, we add to the current literature by showing that acetylcholine and its  
437 analogs modulate hemostasis in vivo.

438 Our study has several limitations which suggest future studies. We have not yet defined  
439 the composition of the acetylcholine receptor on platelets, and we have not identified the role of  
440 all acetylcholine subunits in mediating platelet inhibition. Another limitation is that we have  
441 indirect evidence that platelets store acetylcholine in their granules, since acetylcholinesterase  
442 inhibitors boost platelet inhibition, but we have not directly measured acetylcholine inside platelet  
443 granules.

444 Our studies have pharmacological relevance to humans. We show that donepezil  
445 inhibits platelet activation ex vivo at a concentration between 5 – 50  $\mu$ M (Figure 2D). This  
446 matches the concentration of donepezil of 47  $\mu$ M in serum of humans taking donepezil as a  
447 treatment for Alzheimer's Disease(48). Reports in the literature suggest that drugs targeting the  
448 acetylcholine signaling pathway have modest effects on hemostasis; for example, donepezil  
449 increase bruising by about 2% more than placebo (18). Our data support our proposal that  
450 drugs that target acetylcholine esterase can promote bleeding in humans, and may explain why  
451 donepezil is associated with hemostatic abnormalities in humans.

452 Our study also has therapeutic implications for the management of thrombosis. Our data  
453 suggest that drugs targeting acetylcholine receptor subunits might inhibit thrombosis.  
454 Furthermore, our data suggest that drugs increasing acetylcholine signaling will increase the risk  
455 of bleeding and bruising in patients.



457 **Acknowledgments**

458 a) Acknowledgements: J. A. Bennett, C. N. Morrell, S. J. Cameron, and C. J. Lowenstein  
459 designed the experiments. J. A. Bennett and R. A. Schmidt performed the in vitro analyses of  
460 platelets. J. A. Bennett, S. Ture and M. A. Mastrangelo performed the in vivo studies with mice.  
461 J. A. Bennett and C. J. Lowenstein wrote the manuscript. C. N. Morrell, S. J. Cameron, and C.  
462 J. Lowenstein revised the manuscript. C. J. Lowenstein supervised the research.

463 b) Sources of Funding: This work supported by grants: R01 HL134894 (CJL), R01  
464 HL124018 (CNM), K08 HL128856 (SJC).

465 c) Disclosures: The authors declare that no conflicts of interest exist.

466

467

## 468 **References**

- 469 1. Ho-Tin-Noe B, Demers M, Wagner DD. How platelets safeguard vascular integrity.  
470 *Journal of thrombosis and haemostasis : JTH*. 2011;9 Suppl 1:56-65.
- 471 2. Joshi S, Whiteheart SW. The nuts and bolts of the platelet release reaction. *Platelets*.  
472 2017;28(2):129-37.
- 473 3. Stalker TJ, Welsh JD, Brass LF. Shaping the platelet response to vascular injury. *Curr*  
474 *Opin Hematol*. 2014;21(5):410-7.
- 475 4. Boeynaems JM, Communi D, Gonzalez NS, Robaye B. Overview of the P2 receptors.  
476 *Semin Thromb Hemost*. 2005;31(2):139-49.
- 477 5. Ghoshal K, Bhattacharyya M. Overview of platelet physiology: its hemostatic and  
478 nonhemostatic role in disease pathogenesis. *TheScientificWorldJournal*. 2014;2014:781857.
- 479 6. Hisada Y, Geddings JE, Ay C, Mackman N. Venous thrombosis and cancer: from mouse  
480 models to clinical trials. *Journal of thrombosis and haemostasis : JTH*. 2015;13(8):1372-82.
- 481 7. Coughlin SR. Protease-activated receptors in hemostasis, thrombosis and vascular  
482 biology. *Journal of thrombosis and haemostasis : JTH*. 2005;3(8):1800-14.
- 483 8. Hechler B, Leon C, Vial C, Vigne P, Frelin C, Cazenave JP, et al. The P2Y1 receptor is  
484 necessary for adenosine 5'-diphosphate-induced platelet aggregation. *Blood*. 1998;92(1):152-9.
- 485 9. Jin RC, Voetsch B, Loscalzo J. Endogenous mechanisms of inhibition of platelet function.  
486 *Microcirculation (New York, NY : 1994)*. 2005;12(3):247-58.
- 487 10. Radomski MW, Palmer RM, Moncada S. Endogenous nitric oxide inhibits human platelet  
488 adhesion to vascular endothelium. *Lancet (London, England)*. 1987;2(8567):1057-8.
- 489 11. Moncada S, Higgs EA, Vane JR. Human arterial and venous tissues generate  
490 prostacyclin (prostaglandin x), a potent inhibitor of platelet aggregation. *Lancet (London,*  
491 *England)*. 1977;1(8001):18-20.
- 492 12. Freedman JE, Sauter R, Battinelli EM, Ault K, Knowles C, Huang PL, et al. Deficient  
493 platelet-derived nitric oxide and enhanced hemostasis in mice lacking the NOSIII gene. *Circ*  
494 *Res*. 1999;84(12):1416-21.
- 495 13. Holly SP, Parise LV. Big science for small cells: systems approaches for platelets. *Curr*  
496 *Drug Targets*. 2011;12(12):1859-70.
- 497 14. Cholongitas E, Pipili C, Dasenaki M. Recurrence of upper gastrointestinal bleeding after  
498 donepezil administration. *Alzheimer disease and associated disorders*. 2006;20(4):326.
- 499 15. Gareri P, Gallelli L, Ferreri Ibbadu G, Lacava R, Russo E, De Sarro G. Melaena following  
500 Use of the Cholinesterase Inhibitor Rivastigmine. *Clinical drug investigation*. 2005;25(3):215-7.
- 501 16. Rogers SL, Doody RS, Mohs RC, Friedhoff LT. Donepezil improves cognition and global  
502 function in Alzheimer disease: a 15-week, double-blind, placebo-controlled study. Donepezil  
503 Study Group. *Archives of internal medicine*. 1998;158(9):1021-31.
- 504 17. Tariot PN, Cummings JL, Katz IR, Mintzer J, Perdomo CA, Schwam EM, et al. A  
505 randomized, double-blind, placebo-controlled study of the efficacy and safety of donepezil in  
506 patients with Alzheimer's disease in the nursing home setting. *Journal of the American Geriatrics*  
507 *Society*. 2001;49(12):1590-9.
- 508 18. Birks J. Cholinesterase inhibitors for Alzheimer's disease. *The Cochrane database of*  
509 *systematic reviews*. 2006(1):Cd005593.
- 510 19. Schedel A, Thornton S, Schloss P, Kluter H, Bugert P. Human platelets express  
511 functional alpha7-nicotinic acetylcholine receptors. *Arteriosclerosis, thrombosis, and vascular*  
512 *biology*. 2011;31(4):928-34.
- 513 20. Kooijman S, Meurs I, van der Stoep M, Habets KL, Lammers B, Berbee JF, et al.  
514 Hematopoietic alpha7 nicotinic acetylcholine receptor deficiency increases inflammation and

- 515 platelet activation status, but does not aggravate atherosclerosis. *Journal of thrombosis and*  
516 *haemostasis* : JTH. 2015;13(1):126-35.
- 517 21. Cameron SJ, Ture SK, Mickelsen D, Chakrabarti E, Modjeski KL, McNitt S, et al. Platelet  
518 Extracellular Regulated Protein Kinase 5 Is a Redox Switch and Triggers Maladaptive Platelet  
519 Responses and Myocardial Infarct Expansion. *Circulation*. 2015;132(1):47-58.
- 520 22. Zhu Q, Yamakuchi M, Ture S, de la Luz Garcia-Hernandez M, Ko KA, Modjeski KL, et al.  
521 Syntaxin-binding protein STXBP5 inhibits endothelial exocytosis and promotes platelet  
522 secretion. *The Journal of clinical investigation*. 2014;124(10):4503-16.
- 523 23. Bennett JA, Singh KP, Unnisa Z, Welle SL, Gasiewicz TA. Deficiency in Aryl  
524 Hydrocarbon Receptor (AHR) Expression throughout Aging Alters Gene Expression Profiles in  
525 Murine Long-Term Hematopoietic Stem Cells. *PloS one*. 2015;10(7):e0133791.
- 526 24. Zuccolo E, Lim D, Kheder DA, Perna A, Catarsi P, Botta L, et al. Acetylcholine induces  
527 intracellular Ca<sup>2+</sup> oscillations and nitric oxide release in mouse brain endothelial cells. *Cell*  
528 *calcium*. 2017;66:33-47.
- 529 25. Sase K, Michel T. Expression of constitutive endothelial nitric oxide synthase in human  
530 blood platelets. *Life Sci*. 1995;57(22):2049-55.
- 531 26. Jagadeeswaran P, Cooley BC, Gross PL, Mackman N. Animal Models of Thrombosis  
532 From Zebrafish to Nonhuman Primates: Use in the Elucidation of New Pathologic Pathways and  
533 the Development of Antithrombotic Drugs. *Circ Res*. 2016;118(9):1363-79.
- 534 27. Itier V, Bertrand D. Neuronal nicotinic receptors: from protein structure to function. *FEBS*  
535 *letters*. 2001;504(3):118-25.
- 536 28. Beker F, Weber M, Fink RH, Adams DJ. Muscarinic and nicotinic ACh receptor activation  
537 differentially mobilize Ca<sup>2+</sup> in rat intracardiac ganglion neurons. *Journal of neurophysiology*.  
538 2003;90(3):1956-64.
- 539 29. Unwin N. Refined structure of the nicotinic acetylcholine receptor at 4A resolution.  
540 *Journal of molecular biology*. 2005;346(4):967-89.
- 541 30. Morales-Perez CL, Noviello CM, Hibbs RE. X-ray structure of the human alpha4beta2  
542 nicotinic receptor. *Nature*. 2016;538(7625):411-5.
- 543 31. Mishina M, Takai T, Imoto K, Noda M, Takahashi T, Numa S, et al. Molecular distinction  
544 between fetal and adult forms of muscle acetylcholine receptor. *Nature*. 1986;321(6068):406-11.
- 545 32. Radomski MW, Palmer RM, Moncada S. An L-arginine/nitric oxide pathway present in  
546 human platelets regulates aggregation. *Proceedings of the National Academy of Sciences of the*  
547 *United States of America*. 1990;87(13):5193-7.
- 548 33. Radomski MW, Palmer RM, Moncada S. Characterization of the L-arginine:nitric oxide  
549 pathway in human platelets. *British journal of pharmacology*. 1990;101(2):325-8.
- 550 34. Radomski MW, Palmer RM, Moncada S. The anti-aggregating properties of vascular  
551 endothelium: interactions between prostacyclin and nitric oxide. *British journal of pharmacology*.  
552 1987;92(3):639-46.
- 553 35. Radomski MW, Palmer RM, Moncada S. The role of nitric oxide and cGMP in platelet  
554 adhesion to vascular endothelium. *Biochemical and biophysical research communications*.  
555 1987;148(3):1482-9.
- 556 36. Gkaliagkousi E, Ritter J, Ferro A. Platelet-derived nitric oxide signaling and regulation.  
557 *Circ Res*. 2007;101(7):654-62.
- 558 37. Matsushita K, Morrell CN, Cambien B, Yang SX, Yamakuchi M, Bao C, et al. Nitric oxide  
559 regulates exocytosis by S-nitrosylation of N-ethylmaleimide-sensitive factor. *Cell*.  
560 2003;115(2):139-50.
- 561 38. Doni MG, Alexandre A, Padoin E, Bertoncillo S, Deana R. Nitrovasodilators and cGMP  
562 inhibit human platelet activation. *Cardioscience*. 1991;2(3):161-5.
- 563 39. Liu Y, Luo W, Yang H, Fang W, Xi T, Li Y, et al. Stimulation of nitric oxide production  
564 contributes to the antiplatelet and antithrombotic effect of new peptide pENW (pGlu-Asn-Trp).  
565 *Thrombosis research*. 2015;136(2):319-27.

- 566 40. Sanchez Centellas D, Gudlur S, Vicente-Carrillo A, Ramstrom S, Lindahl TL. A cluster of  
567 aspartic residues in the extracellular loop II of PAR 4 is important for thrombin interaction and  
568 activation of platelets. *Thrombosis research*. 2017;154:84-92.
- 569 41. Ramachandran R, Mihara K, Thibeault P, Vanderboor CM, Petri B, Saifeddine M, et al.  
570 Targeting a Proteinase-Activated Receptor 4 (PAR4) Carboxyl Terminal Motif to Regulate  
571 Platelet Function. *Molecular pharmacology*. 2017;91(4):287-95.
- 572 42. Jin J, Daniel JL, Kunapuli SP. Molecular basis for ADP-induced platelet activation. II. The  
573 P2Y1 receptor mediates ADP-induced intracellular calcium mobilization and shape change in  
574 platelets. *The Journal of biological chemistry*. 1998;273(4):2030-4.
- 575 43. Marlas G, Joseph D, Huet C. Subunit structure of a potent platelet-activating glycoprotein  
576 isolated from the venom of *Crotalus durissus cascavella*. *Biochimie*. 1983;65(11-12):619-28.
- 577 44. Niedergang F, Alcover A, Knight CG, Farndale RW, Barnes MJ, Francischetti IM, et al.  
578 Convulxin binding to platelet receptor GPVI: competition with collagen related peptides.  
579 *Biochemical and biophysical research communications*. 2000;273(1):246-50.
- 580 45. Goel D. Ticagrelor: The first approved reversible oral antiplatelet agent. *International*  
581 *journal of applied & basic medical research*. 2013;3(1):19-21.
- 582 46. Patel PA, Lane B, Augoustides JG. Progress in platelet blockers: the target is the P2Y12  
583 receptor. *Journal of cardiothoracic and vascular anesthesia*. 2013;27(3):620-4.
- 584 47. von Kugelgen I. Structure, Pharmacology and Roles in Physiology of the P2Y12  
585 Receptor. *Advances in experimental medicine and biology*. 2017.
- 586 48. Hefner G, Brueckner A, Hiemke C, Fellgiebel A. Therapeutic drug monitoring for patients  
587 with Alzheimer dementia to improve treatment with donepezil. *Ther Drug Monit*. 2015;37(3):353-  
588 61.
- 589



# Figure 1

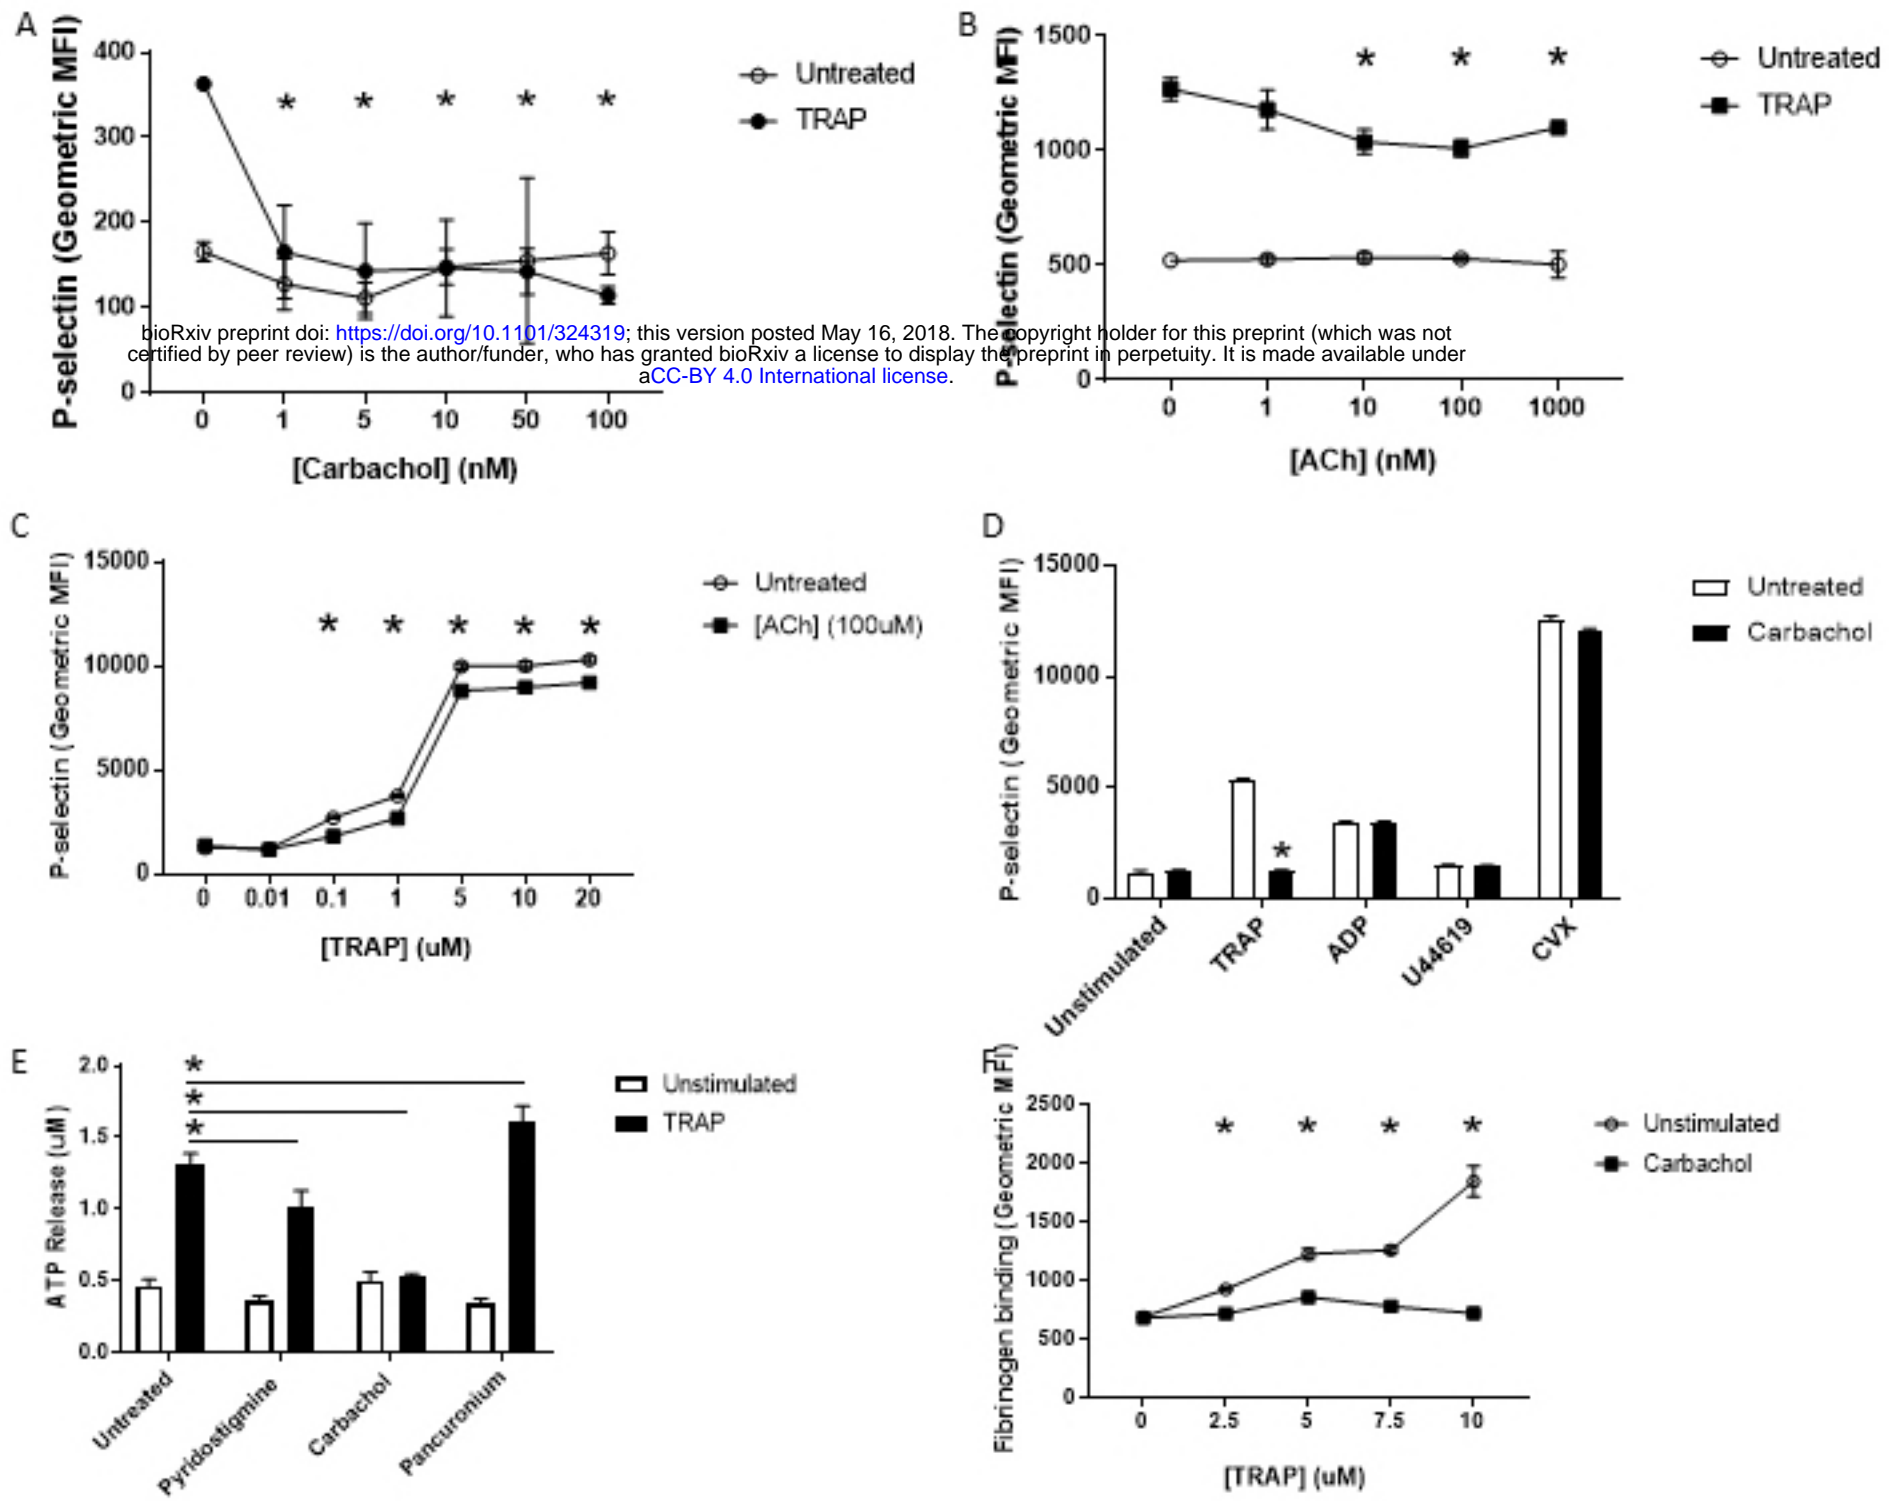

# Figure 2

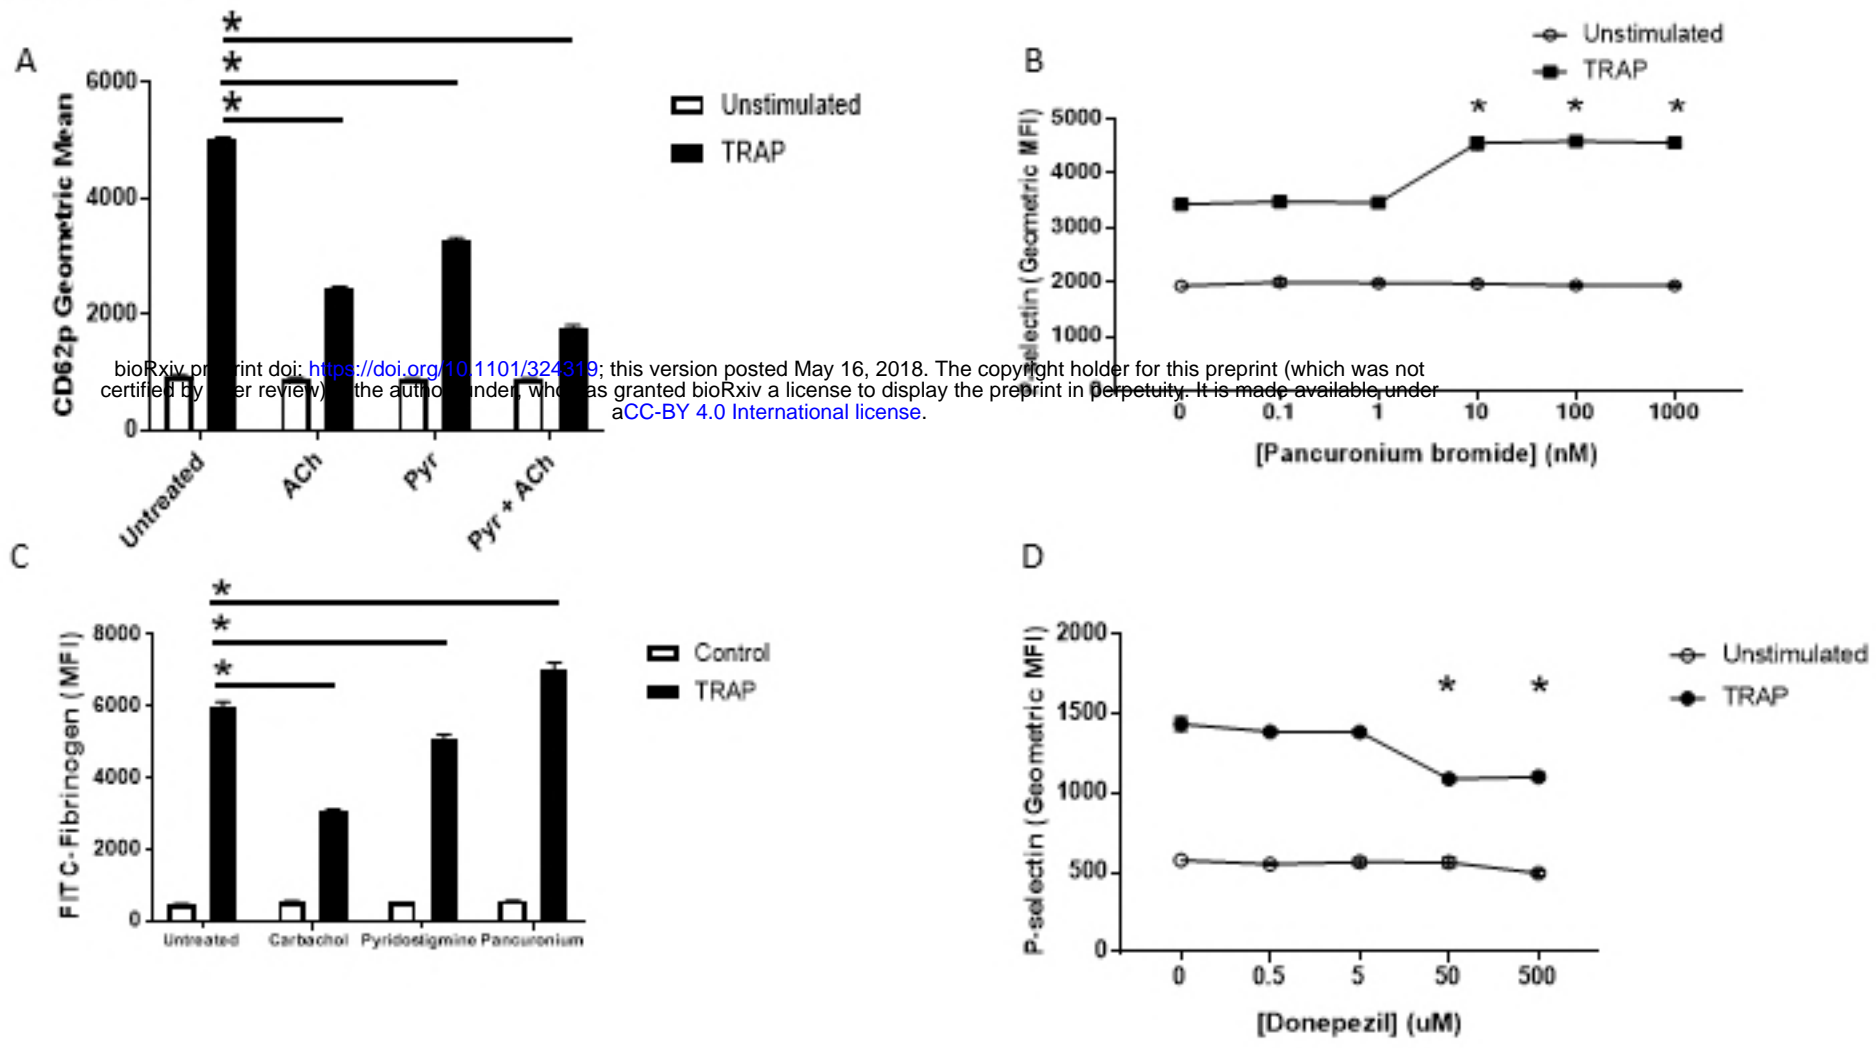

# Figure 3

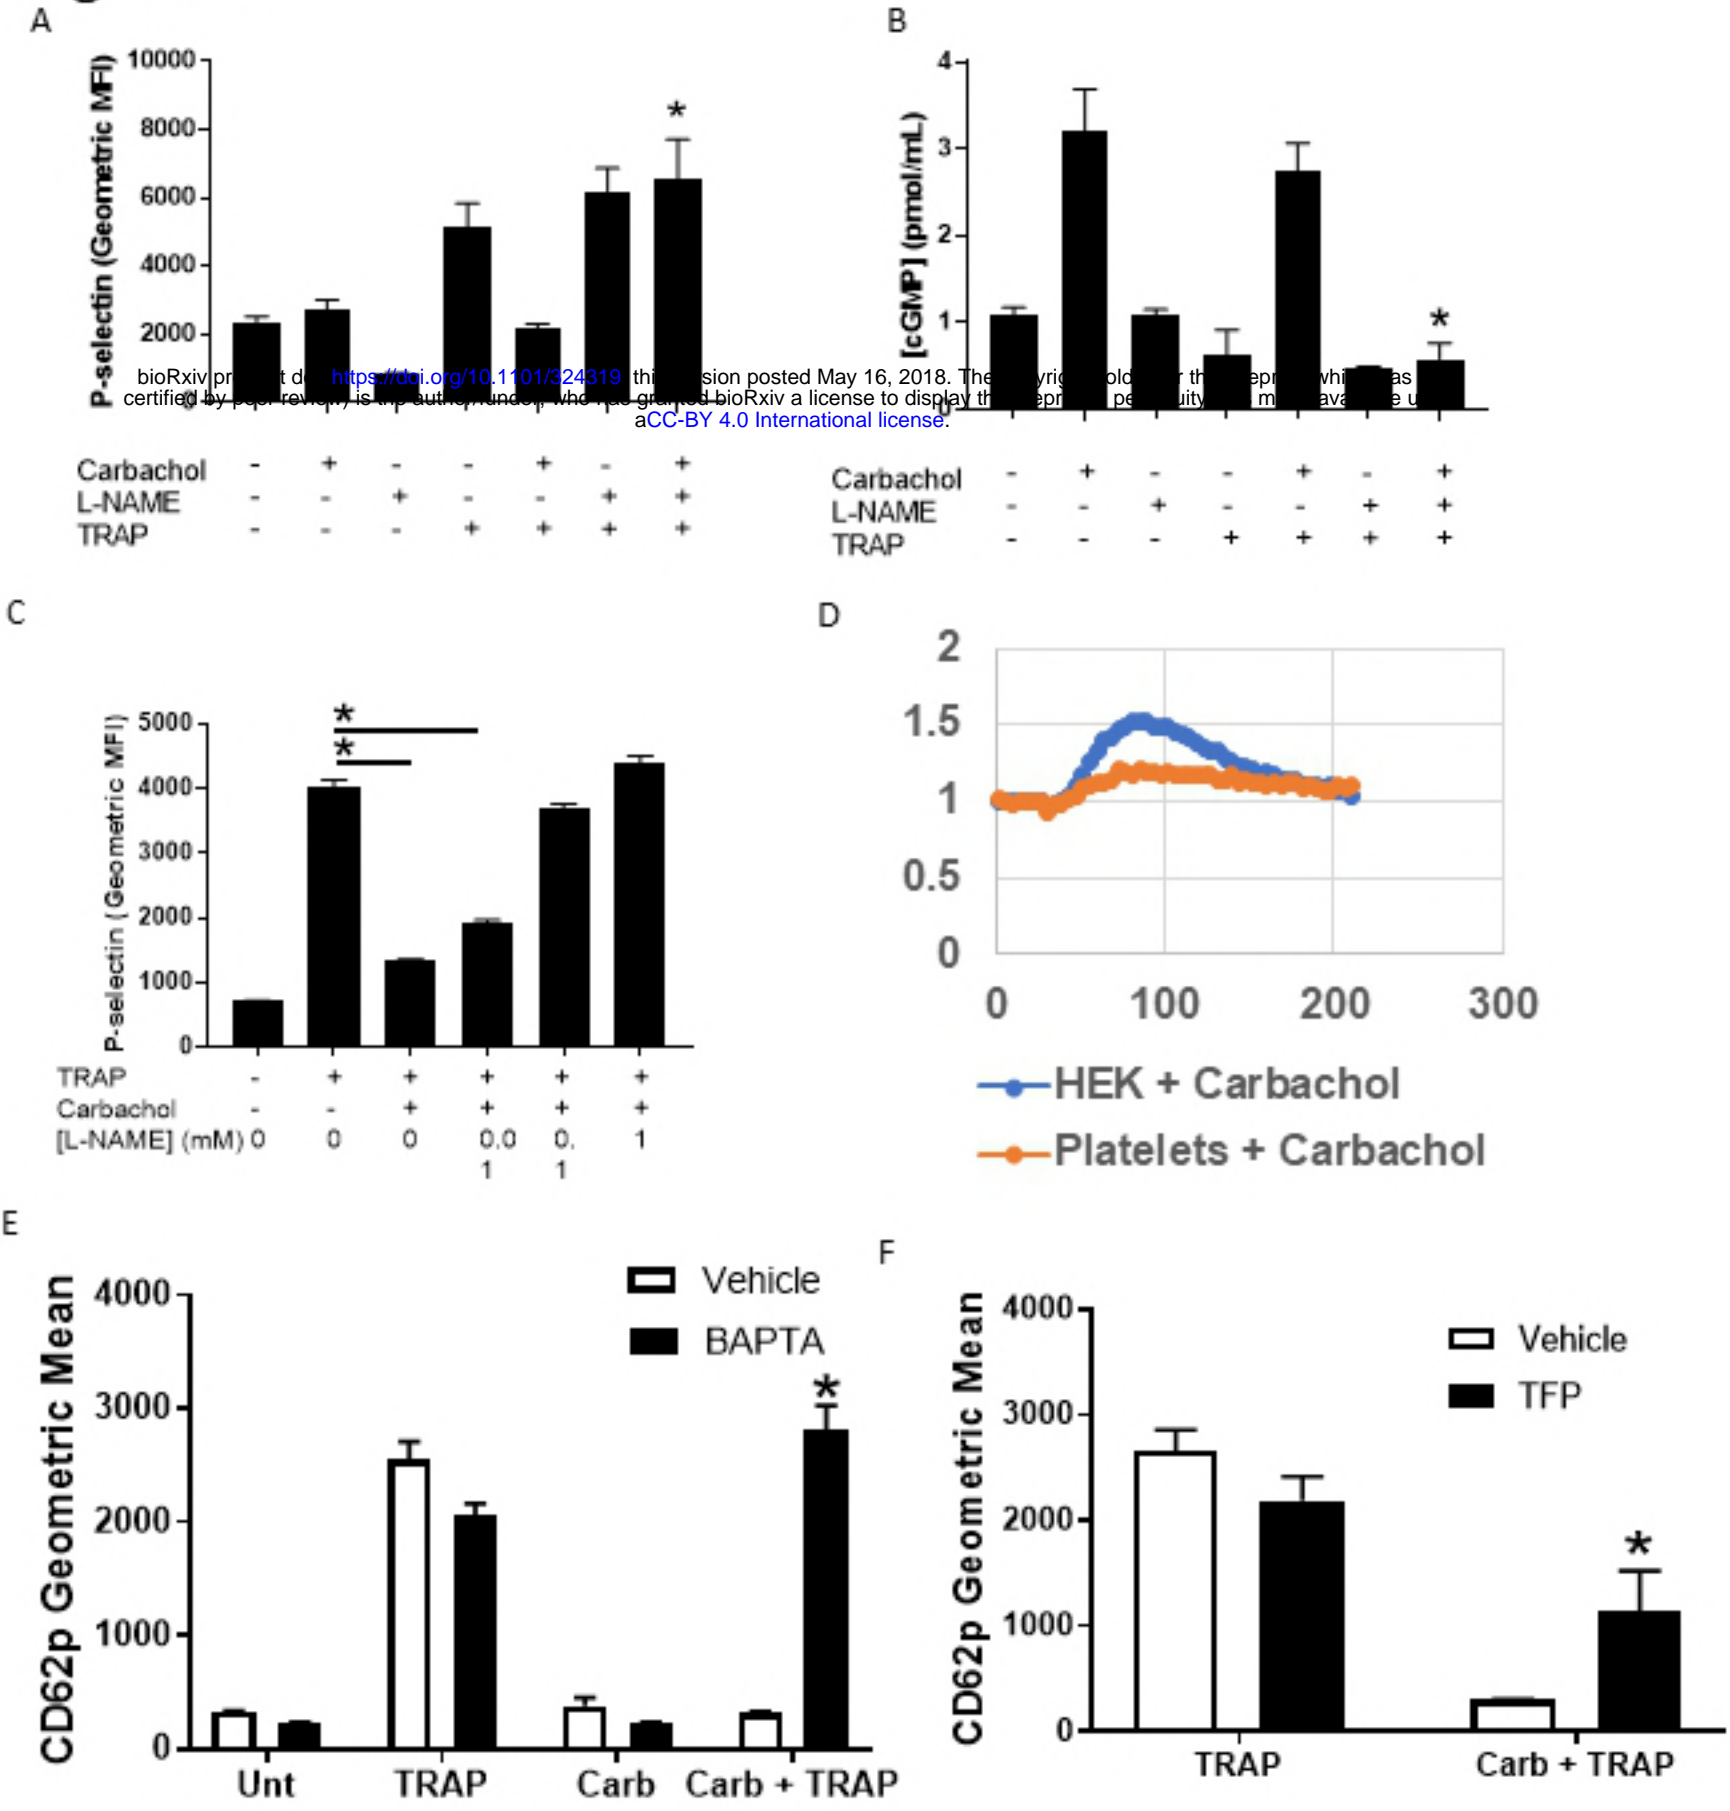

Figure 4

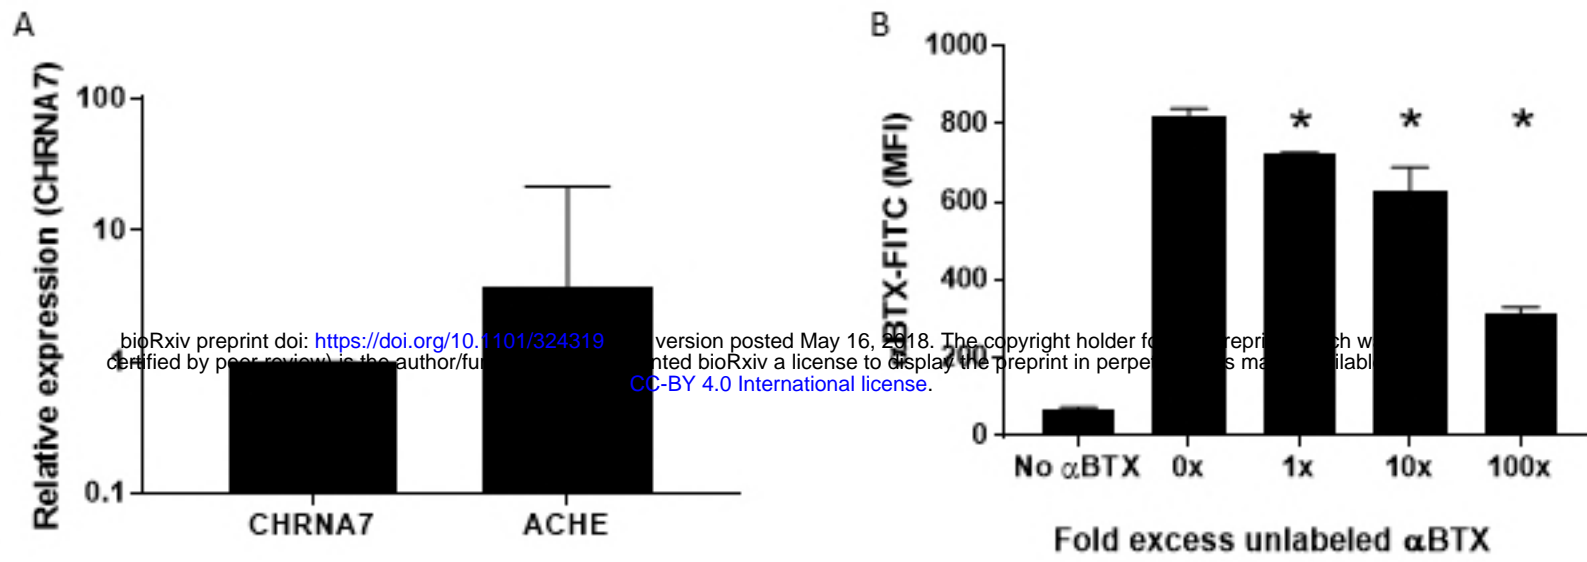

# Figure 5

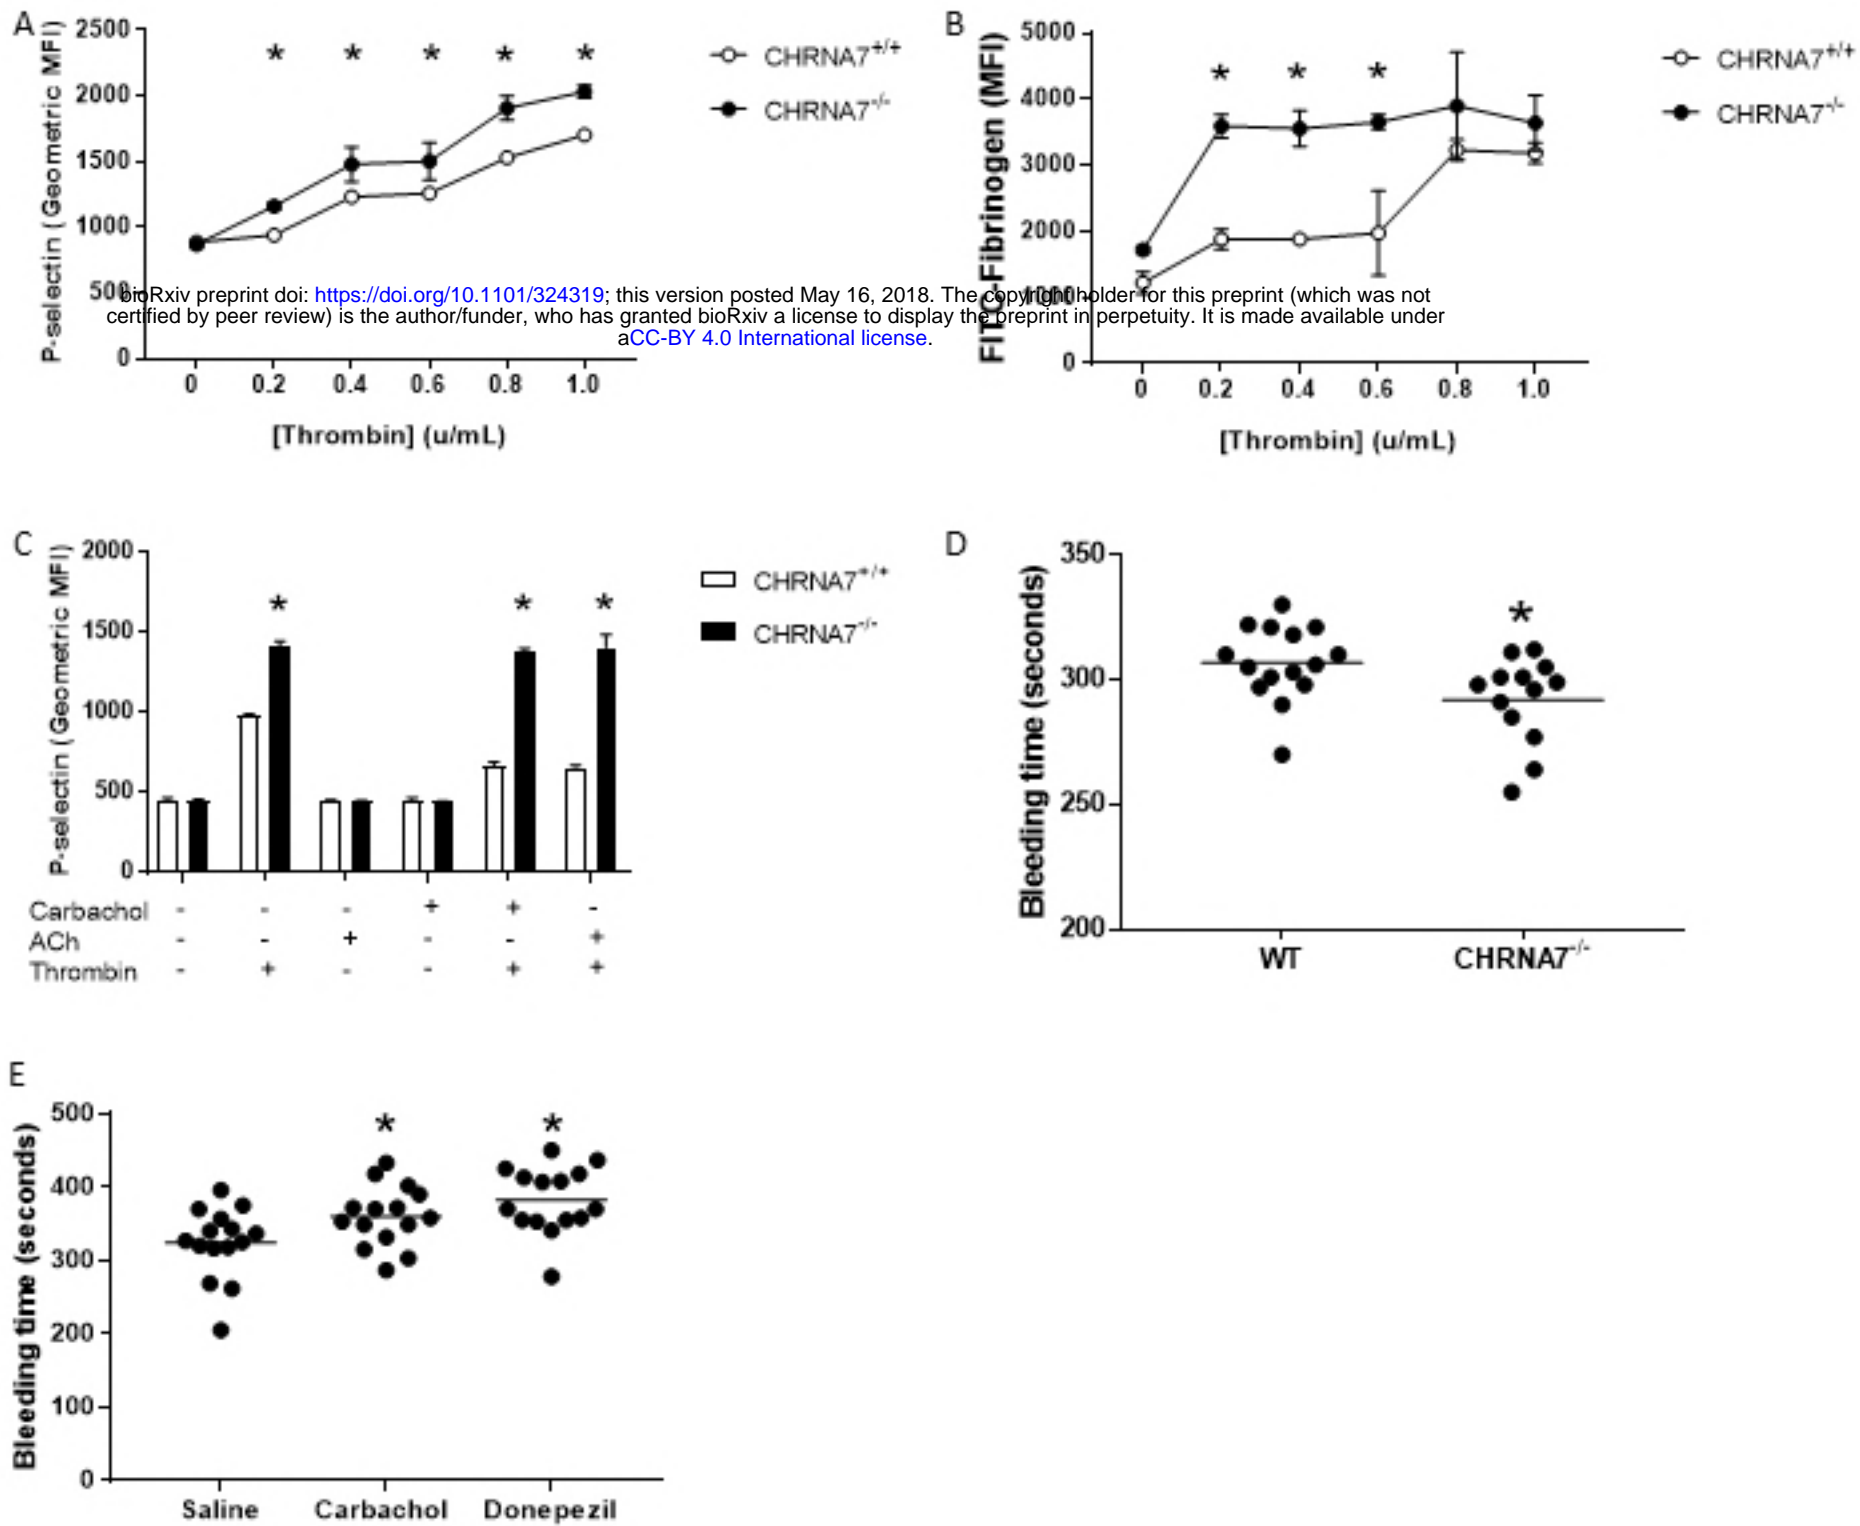

Source: https://www.biorxiv.org/content/10.1101/324319v1.full.pdf
